# Supplementary material for: Supramolecular assembly of lanthanide-2,3,5,6-tetrafluoroterephthalic acid coordination polymers via fluorine⋯fluorine interactions: a platform for luminescent detection of Fe3+ and nitroaromatic compounds
Source: Royal Society of Chemistry journal article supplement (doi:10.1039/d0nj02604b), 2020-01-01
Supplement: d0nj02604b1.pdf [file d0nj02604b1.pdf]

# Supramolecular Assembly of Lanthanide-2,3,5,6-Tetrafluoroterephthalic Acid Coordination Polymers via Fluorine•••Fluorine Interactions: A Platform for Luminescent Detection of Fe<sup>3+</sup> and Nitroaromatic Compounds

*Jermaine A. Smith,<sup>a</sup> Marvadeen A. Singh-Wilmot,<sup>a\*</sup> Korey P. Carter,<sup>b</sup> Christopher L. Cahill,<sup>b</sup> and J. August Ridenour<sup>b</sup>*

<sup>a</sup> Department of Chemistry, Faculty of Science and Technology, The University of the West Indies, Mona, Jamaica.

<sup>b</sup> Department of Chemistry, The George Washington University, 800 22<sup>nd</sup> NW, Washington D.C. 20052, United States of America.

**Table S1.** Crystallographic data for compounds **1 – 14**.

|                                                       | <b>1 – La</b>                                                  | <b>2 – Ce</b>                                                  | <b>3 – Pr</b>                                                  | <b>4 – Nd</b>                                                  | <b>5 – Sm</b>                                                  |
|-------------------------------------------------------|----------------------------------------------------------------|----------------------------------------------------------------|----------------------------------------------------------------|----------------------------------------------------------------|----------------------------------------------------------------|
| Chemical Formula                                      | LaC <sub>12</sub> H <sub>6</sub> F <sub>6</sub> O <sub>9</sub> | CeC <sub>12</sub> H <sub>6</sub> F <sub>6</sub> O <sub>9</sub> | PrC <sub>12</sub> H <sub>6</sub> F <sub>6</sub> O <sub>9</sub> | NdC <sub>12</sub> H <sub>6</sub> F <sub>6</sub> O <sub>9</sub> | SmC <sub>12</sub> H <sub>6</sub> F <sub>6</sub> O <sub>9</sub> |
| Formula Weight                                        | 547.08                                                         | 548.29                                                         | 549.08                                                         | 552.41                                                         | 558.52                                                         |
| Crystal System                                        | Monoclinic                                                     | Monoclinic                                                     | Monoclinic                                                     | Monoclinic                                                     | Monoclinic                                                     |
| Space Group                                           | I 2/m                                                          |
| a (Å)                                                 | 11.8148(5)                                                     | 11.7966(13)                                                    | 11.7587(7)                                                     | 11.7314(4)                                                     | 11.6844(9)                                                     |
| b (Å)                                                 | 11.3729(5)                                                     | 11.3785(11)                                                    | 11.3554(7)                                                     | 11.3436(4)                                                     | 11.2772(5)                                                     |
| c (Å)                                                 | 11.8979(8)                                                     | 11.9288(13)                                                    | 11.9289(11)                                                    | 11.9360(6)                                                     | 11.8934(6)                                                     |
| $\alpha$ (°)                                          | 90                                                             | 90                                                             | 90                                                             | 90                                                             | 90                                                             |
| $\beta$ (°)                                           | 106.398(2)                                                     | 106.795(2)                                                     | 106.930(11)                                                    | 107.150(7)                                                     | 107.051(8)                                                     |
| $\gamma$ (°)                                          | 90                                                             | 90                                                             | 90                                                             | 90                                                             | 90                                                             |
| V (Å <sup>3</sup> )                                   | 1533.67(14)                                                    | 1532.9(3)                                                      | 1523.8(2)                                                      | 1517.77(12)                                                    | 1498.28(16)                                                    |
| Z                                                     | 4                                                              | 4                                                              | 4                                                              | 4                                                              | 4                                                              |
| T (K)                                                 | 293(2)                                                         | 293(2)                                                         | 293(2)                                                         | 293(2)                                                         | 293(2)                                                         |
| $\lambda$ (Mo K $\alpha$ )                            | 0.71073                                                        | 0.71073                                                        | 0.71073                                                        | 0.71073                                                        | 0.71073                                                        |
| D <sub>calc</sub> (mg m <sup>-3</sup> )               | 2.369                                                          | 2.376                                                          | 2.393                                                          | 2.417                                                          | 2.476                                                          |
| $\mu$ (mm <sup>-1</sup> )                             | 2.906                                                          | 3.090                                                          | 3.319                                                          | 3.543                                                          | 4.043                                                          |
| GOF on F <sup>2</sup>                                 | 1.245                                                          | 1.099                                                          | 1.080                                                          | 1.177                                                          | 1.059                                                          |
| R <sub>int</sub>                                      | 0.0331                                                         | 0.0267                                                         | 0.0301                                                         | 0.0178                                                         | 0.0228                                                         |
| R <sub>1</sub> , wR <sub>2</sub> [I > 2 $\sigma$ (I)] | 0.0203, 0.0559                                                 | 0.0183, 0.0429                                                 | 0.0190, 0.0433                                                 | 0.0152, 0.0395                                                 | 0.0214, 0.0537                                                 |
| R <sub>1</sub> , wR <sub>2</sub> (all data)           | 0.0215, 0.0566                                                 | 0.0188, 0.0431                                                 | 0.0208, 0.0441                                                 | 0.0156, 0.0397                                                 | 0.0236, 0.0547                                                 |
| CCDC Number                                           | 1935535                                                        | 1935536                                                        | 1935537                                                        | 1935538                                                        | 1935539                                                        |
|                                                       | <b>6 – Eu</b>                                                  | <b>7 – Gd</b>                                                  | <b>8 – Tb</b>                                                  | <b>9 – Dy</b>                                                  | <b>10 – Ho</b>                                                 |
| Chemical Formula                                      | EuC <sub>12</sub> H <sub>6</sub> F <sub>6</sub> O <sub>9</sub> | GdC <sub>12</sub> H <sub>6</sub> F <sub>6</sub> O <sub>9</sub> | TbC <sub>12</sub> H <sub>6</sub> F <sub>6</sub> O <sub>9</sub> | DyC <sub>12</sub> H <sub>6</sub> F <sub>6</sub> O <sub>9</sub> | HoC <sub>12</sub> H <sub>6</sub> F <sub>6</sub> O <sub>9</sub> |
| Formula Weight                                        | 560.13                                                         | 565.42                                                         | 567.09                                                         | 570.67                                                         | 573.10                                                         |
| Crystal System                                        | Monoclinic                                                     | Monoclinic                                                     | Monoclinic                                                     | Monoclinic                                                     | Monoclinic                                                     |
| Space Group                                           | I 2/m                                                          |
| a (Å)                                                 | 11.650(4)                                                      | 11.6277(8)                                                     | 11.6039(12)                                                    | 11.5862(12)                                                    | 11.5655(7)                                                     |

|                                                       |                                                                |                                                                |                |                                                                |                                                                |
|-------------------------------------------------------|----------------------------------------------------------------|----------------------------------------------------------------|----------------|----------------------------------------------------------------|----------------------------------------------------------------|
| b (Å)                                                 | 11.283(3)                                                      | 11.2649(5)                                                     | 11.2358(12)    | 11.2209(7)                                                     | 11.1980(4)                                                     |
| c (Å)                                                 | 11.966(4)                                                      | 11.9648(5)                                                     | 11.9986(19)    | 12.0224(8)                                                     | 12.0457(5)                                                     |
| $\alpha$ (°)                                          | 90                                                             | 90                                                             | 90             | 90                                                             | 90                                                             |
| $\beta$ (°)                                           | 107.656(6)                                                     | 107.745(6)                                                     | 108.027(10)    | 108.174(10)                                                    | 108.321(6)                                                     |
| $\gamma$ (°)                                          | 90                                                             | 90                                                             | 90             | 90                                                             | 90                                                             |
| V (Å <sup>3</sup> )                                   | 1498.8(8)                                                      | 1492.64(15)                                                    | 1487.6(3)      | 1485.0(2)                                                      | 1480.97(13)                                                    |
| Z                                                     | 4                                                              | 4                                                              | 4              | 4                                                              | 4                                                              |
| T (K)                                                 | 293(2)                                                         | 293(2)                                                         | 293(2)         | 293(2)                                                         | 293(2)                                                         |
| $\lambda$ (Mo K $\alpha$ )                            | 0.71073                                                        | 0.71073                                                        | 0.71073        | 0.71073                                                        | 0.71073                                                        |
| D <sub>calc</sub> (mg m <sup>-3</sup> )               | 2.482                                                          | 2.516                                                          | 2.532          | 2.552                                                          | 2.570                                                          |
| $\mu$ (mm <sup>-1</sup> )                             | 4.308                                                          | 4.567                                                          | 4.879          | 5.156                                                          | 5.468                                                          |
| GOF on F <sup>2</sup>                                 | 1.122                                                          | 1.060                                                          | 1.052          | 1.063                                                          | 1.099                                                          |
| R <sub>int</sub>                                      | 0.0264                                                         | 0.0242                                                         | 0.0516         | 0.0180                                                         | 0.0147                                                         |
| R <sub>1</sub> , wR <sub>2</sub> [I > 2 $\sigma$ (I)] | 0.0161, 0.0385                                                 | 0.0157, 0.0379                                                 | 0.0274, 0.0517 | 0.0136, 0.0337                                                 | 0.0117, 0.0300                                                 |
| R <sub>1</sub> , wR <sub>2</sub> (all data)           | 0.0172, 0.0389                                                 | 0.0166, 0.0384                                                 | 0.0321, 0.0534 | 0.0147, 0.0342                                                 | 0.0121, 0.0301                                                 |
| CCDC Number                                           | 1935540                                                        | 1935541                                                        | 1935542        | 1935543                                                        | 1935544                                                        |
|                                                       | <b>11 – Er</b>                                                 | <b>12 – Tm</b>                                                 |                | <b>13 – Yb</b>                                                 | <b>14 – Lu</b>                                                 |
| Chemical Formula                                      | ErC <sub>12</sub> H <sub>6</sub> F <sub>6</sub> O <sub>9</sub> | TmC <sub>12</sub> H <sub>4</sub> F <sub>6</sub> O <sub>9</sub> |                | YbC <sub>12</sub> H <sub>6</sub> F <sub>6</sub> O <sub>9</sub> | LuC <sub>12</sub> H <sub>6</sub> F <sub>6</sub> O <sub>9</sub> |
| Formula Weight                                        | 575.43                                                         | 575.08                                                         |                | 581.21                                                         | 583.14                                                         |
| Crystal System                                        | Monoclinic                                                     | Monoclinic                                                     |                | Triclinic                                                      | Triclinic                                                      |
| Space Group                                           | I 2/m                                                          | I 2/m                                                          |                | P -1                                                           | P -1                                                           |
| a (Å)                                                 | 11.5557(7)                                                     | 11.5247(3)                                                     |                | 8.7710(7)                                                      | 8.8727(16)                                                     |
| b (Å)                                                 | 11.1689(7)                                                     | 11.1200(2)                                                     |                | 8.9368(7)                                                      | 8.8936(16)                                                     |
| c (Å)                                                 | 12.0722(11)                                                    | 12.1254(3)                                                     |                | 11.5310(9)                                                     | 11.561(2)                                                      |
| $\alpha$ (°)                                          | 90                                                             | 90                                                             |                | 67.313(2)                                                      | 67.613(2)                                                      |
| $\beta$ (°)                                           | 108.475(12)                                                    | 108.8680(10)                                                   |                | 68.094(3)                                                      | 67.712(3)                                                      |
| $\gamma$ (°)                                          | 90                                                             | 90                                                             |                | 75.535(2)                                                      | 75.395(2)                                                      |
| V (Å <sup>3</sup> )                                   | 1477.8(2)                                                      | 1470.43(6)                                                     |                | 767.76(11)                                                     | 774.3(2)                                                       |
| Z                                                     | 4                                                              | 4                                                              |                | 2                                                              | 2                                                              |
| T (K)                                                 | 293(2)                                                         | 293(2)                                                         |                | 293(2)                                                         | 293(2)                                                         |

|                                                       |                |                |  |                |                |
|-------------------------------------------------------|----------------|----------------|--|----------------|----------------|
| $\lambda$ (Mo K $\alpha$ )                            | 0.71073        | 0.71073        |  | 0.71073        | 0.71073        |
| D <sub>calc</sub> (mg m <sup>-3</sup> )               | 2.586          | 2.598          |  | 2.497          | 2.501          |
| $\mu$ (mm <sup>-1</sup> )                             | 5.804          | 6.159          |  | 6.210          | 6.495          |
| GOF on F <sup>2</sup>                                 | 1.135          | 1.069          |  | 1.065          | 1.103          |
| R <sub>int</sub>                                      | 0.0227         | 0.0513         |  | 0.0369         | 0.0247         |
| R <sub>1</sub> , wR <sub>2</sub> [I > 2 $\sigma$ (I)] | 0.0194, 0.0476 | 0.0233, 0.0471 |  | 0.0267, 0.0697 | 0.0267, 0.0566 |
| R <sub>1</sub> , wR <sub>2</sub> (all data)           | 0.0200, 0.0479 | 0.0259, 0.0484 |  | 0.0275, 0.0703 | 0.0325, 0.0582 |
| CCDC Number                                           | 1935545        | 1935546        |  | 1935547        | 1935548        |

Table S2. Yields, elemental C, H analysis and main IR peaks for compounds in series **1**.

| Compound                                                                                                        | Yield based on H <sub>2</sub> TFTA (%) | Elemental C, H Analysis (%)                        | Main FTIR Peaks (ATR, cm <sup>-1</sup> )                                                                                                                                       |
|-----------------------------------------------------------------------------------------------------------------|----------------------------------------|----------------------------------------------------|--------------------------------------------------------------------------------------------------------------------------------------------------------------------------------|
| {[La(TFTA) <sub>1.5</sub> (H <sub>2</sub> O) <sub>2</sub> ] $\cdot$ H <sub>2</sub> O} <sub>n</sub> ( <b>1</b> ) | 45                                     | Calc.: C, 26.35; H, 1.11. Found: C, 26.25; H, 0.71 | 3649(w), 3629(w), 3450(br,w), 1617(s), 1556(s), 1508(w), 1488(m), 1458(m), 1397(s), 1378(s), 1265(w), 1055(w), 1032(w), 992(s), 909(w), 835(w), 811(w), 753(s), 730(s), 672(w) |
| {[Ce(TFTA) <sub>1.5</sub> (H <sub>2</sub> O) <sub>2</sub> ] $\cdot$ H <sub>2</sub> O} <sub>n</sub> ( <b>2</b> ) | 38                                     | Calc.: C, 26.29 H, 1.10. Found: C, H,              | 3648(w), 3629(w), 3442(br,w), 1612(s), 1554(s), 1488(m), 1458(m), 1397(s), 1378(s), 1265(w), 1028(w), 993(s), 909(w), 835(w), 811(w), 752(s), 729(s), 670(w)                   |
| {[Pr(TFTA) <sub>1.5</sub> (H <sub>2</sub> O) <sub>2</sub> ] $\cdot$ H <sub>2</sub> O} <sub>n</sub> ( <b>3</b> ) | 24                                     | Calc.: C, 26.25; H, 1.10. Found: C, 26.01; H, 0.73 | 3755(w), 3653(w), 3451(br,w), 1613(s), 1555(s), 1487(m), 1455(m), 1396(s), 1378(s), 1265(w), 1029(w), 993(s), 909(w), 834(w), 811(w), 752(s), 730(s), 669(w)                   |
| {[Nd(TFTA) <sub>1.5</sub> (H <sub>2</sub> O) <sub>2</sub> ] $\cdot$ H <sub>2</sub> O} <sub>n</sub> ( <b>4</b> ) | 51                                     | Calc.: C, 26.09; H, 1.09. Found: C, 26.09; H, 0.74 | 3745(w), 3647(w), 3403(br,w), 1614(s), 1555(s), 1488(m), 1456(m), 1396(s), 1379(s), 1265(w), 1030(w), 993(s), 910(w), 834(w), 811(w), 752(s), 730(s), 665(w)                   |
| {[Sm(TFTA) <sub>1.5</sub> (H <sub>2</sub> O) <sub>2</sub> ] $\cdot$ H <sub>2</sub> O} <sub>n</sub> ( <b>5</b> ) |                                        | Calc.: C, 25.81; H, 1.08. Found: C, H,             | 3749(w), 3668(w), 3450(br,w), 1620(s), 1556(s), 1489(m), 1460(m), 1400(s), 1381(s), 1266(w), 995(s), 911(w), 835(w), 811(w), 754(s), 732(s), 672(w)                            |
| {[Eu(TFTA) <sub>1.5</sub> (H <sub>2</sub> O) <sub>2</sub> ] $\cdot$ H <sub>2</sub> O} <sub>n</sub> ( <b>6</b> ) | 40                                     | Calc.: C, 25.73; H, 1.08. Found: C, 25.89 H,       | 3668(w), 3472(br,w), 1611(s), 1556(s), 1488(m), 1457(m), 1397(s), 1265(w), 1028(w), 994(s), 911(w), 834(w), 811(w), 753(s), 731(s), 665(w)                                     |

|                                                                                              |    |                                                   |                                                                                                                                                                       |
|----------------------------------------------------------------------------------------------|----|---------------------------------------------------|-----------------------------------------------------------------------------------------------------------------------------------------------------------------------|
|                                                                                              |    | 0.66                                              |                                                                                                                                                                       |
| $\{\{\text{Gd}(\text{TFTA})_{1.5}(\text{H}_2\text{O})_2\} \cdot \text{H}_2\text{O}\}_n$ (7)  | 17 | Calc.: C, 25.49; H, 1.07. Found: C, H,            | 3670(w), 3467(br,w), 1620(s), 1559(s), 1490(m), 1459(m), 1401(s), 1382(s), 1267(w), 1032(w), 995(s), 913(w), 835(w), 812(w), 755(s), 732(s), 663(w)                   |
| $\{\{\text{Tb}(\text{TFTA})_{1.5}(\text{H}_2\text{O})_2\} \cdot \text{H}_2\text{O}\}_n$ (8)  | 22 | Calc.: C, 25.42 H, 1.07. Found: C, 25.60 H, 0.76  | 3668(w), 3450(br,w), 1614(s), 1556(s), 1489(m), 1458(m), 1400(s), 1382(s), 1266(w), 1032(w), 995(s), 913(w), 834(w), 811(w), 755(s), 730(s), 672(w)                   |
| $\{\{\text{Dy}(\text{TFTA})_{1.5}(\text{H}_2\text{O})_2\} \cdot \text{H}_2\text{O}\}_n$ (9)  | 37 | Calc.: C, 25.26; H, 1.06. Found: C, H,            | 3671(w), 3470(br,w), 1614(s), 1593(s), 1556(s), 1490(m), 1457(m), 1401(s), 1383(s), 1267(w), 1092(w), 1032(w), 996(s), 913(w), 834(w), 811(w), 756(s), 731(s), 663(w) |
| $\{\{\text{Ho}(\text{TFTA})_{1.5}(\text{H}_2\text{O})_2\} \cdot \text{H}_2\text{O}\}_n$ (10) | 80 | Calc.: C, 25.15 H, 1.06. Found: C, H,             | 3670(w), 3416(br,w), 1615(s), 1593(s), 1556(s), 1489(m), 1457(m), 1401(s), 1382(s), 1266(w), 1092(w), 1032(w), 995(s), 913(w), 834(w), 811(w), 755(s), 731(s), 663(w) |
| $\{\{\text{Er}(\text{TFTA})_{1.5}(\text{H}_2\text{O})_2\} \cdot \text{H}_2\text{O}\}_n$ (11) | 39 | Calc.: C, 25.05; H, 1.05. Found: C, 24.62 H, 0.58 | 3671(w), 3472(br,w), 1619(s), 1594(s), 1559(s), 1489(m), 1459(m), 1402(s), 1382(s), 1267(w), 1136(w), 1034(w), 996(s), 914(w), 834(w), 812(w), 755(s), 732(s), 698(w) |
| $\{\{\text{Tm}(\text{TFTA})_{1.5}(\text{H}_2\text{O})_2\} \cdot \text{H}_2\text{O}\}_n$ (12) | 19 | Calc.: C, 24.97; H, 1.05. Found: C, H             | 3670(w), 3450(br,w), 1615(s), 1593(s), 1557(s), 1490(m), 1458(m), 1404(s), 1267(w), 1137(w), 1034(w), 996(s), 915(w), 834(w), 812(w), 756(s), 731(s), 698(w)          |

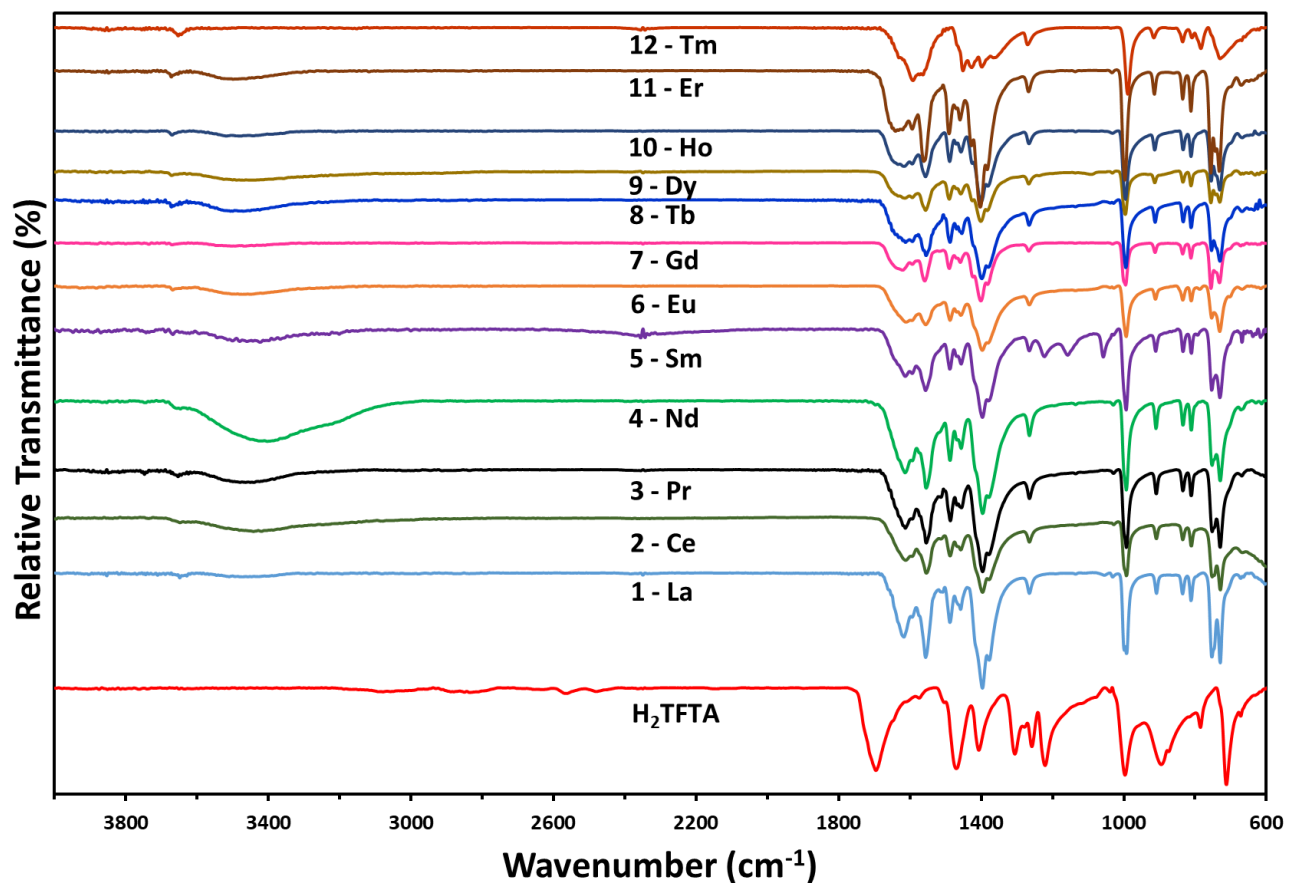

Figure S1. FTIR spectra of 2,3,5,6-tetrafluoroterephthalic acid (H<sub>2</sub>TFTA) and compounds in series **1**.

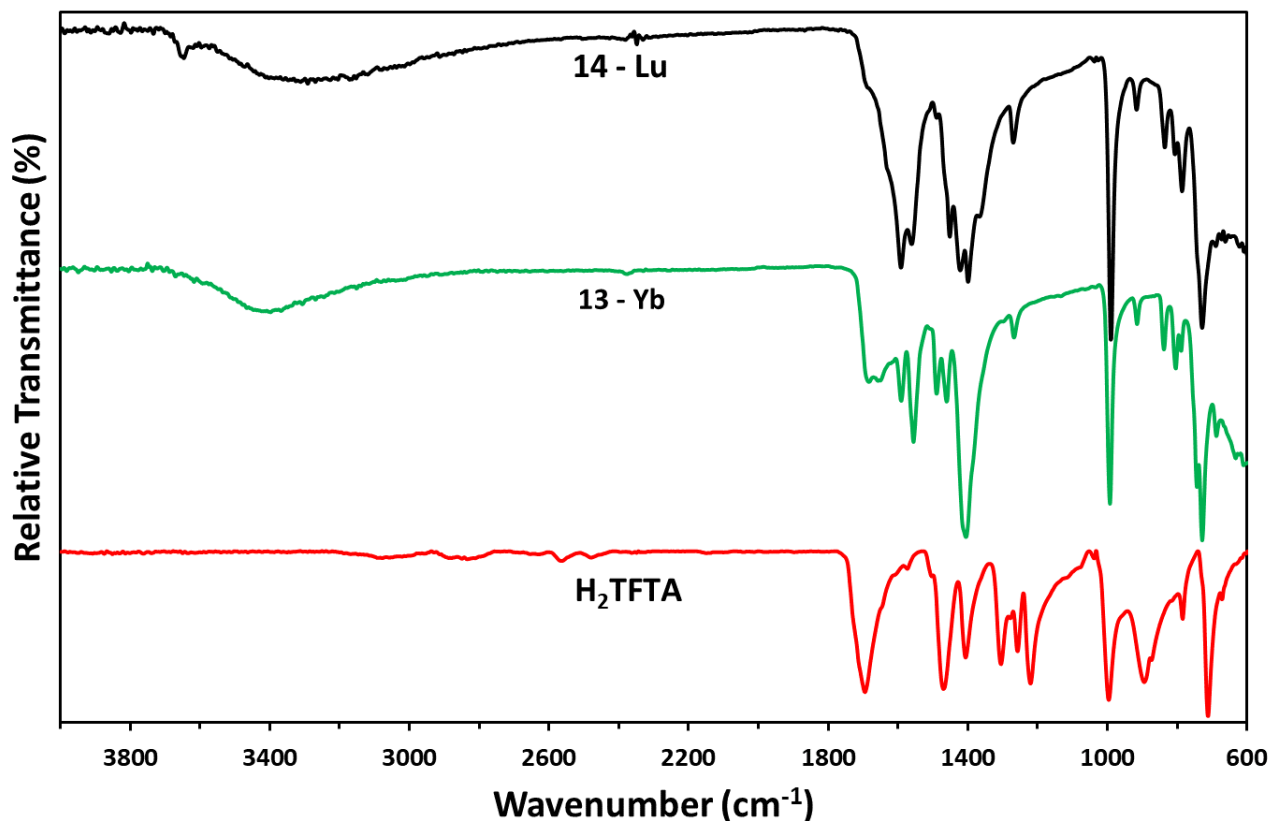

Figure S2. FTIR scans of 2,3,5,6-tetrafluoroterephthalic acid ( $H_2TFTA$ ) and compounds in series **2**.

Table S3. Yields, elemental C, H analysis and main FTIR peaks for compounds in series **2**.

| Compound                                                  | Yield based on $H_2TFTA$ (%) | Elemental C, H Analysis (%)            | Main FT-IR Peaks (ATR, $cm^{-1}$ )                                                                                                                                  |
|-----------------------------------------------------------|------------------------------|----------------------------------------|---------------------------------------------------------------------------------------------------------------------------------------------------------------------|
| $\{[Yb(TFTA)_{1.5}(H_2O)_2] \cdot H_2O\}_n$ ( <b>13</b> ) | 33                           | Calc.: C, 24.80; H, 1.04. Found: C, H, | 3414(br,w), 1684(m), 1659(m), 1592(m), 1556(s), 1490(m), 1461(m), 1406(s), 1268(w), 1135(w), 993(s), 916(w), 839(w), 805(w), 790(w), 744(s), 729(s), 688(w), 633(w) |
| $\{[Lu(TFTA)_{1.5}(H_2O)_2] \cdot H_2O\}_n$ ( <b>14</b> ) | 26                           | Calc.: C, 24.72; H, 1.04. Found: C, H, | 3647(w), 3305(br,w), 1592(s), 1561(s), 1490(w), 1453(s), 1422(s), 1400(s), 1270(w), 990(s), 917(w), 836(w), 807(w), 787(w), 729(s), 690(w), 663(w)                  |

Table S4. Selected bond lengths (Å) and angles (°) for Compounds 1 – 14.

| Compound 1                                                                                                                                                     |            |            |            | Compound 2                                                                                                                                                         |            |              |            |
|----------------------------------------------------------------------------------------------------------------------------------------------------------------|------------|------------|------------|--------------------------------------------------------------------------------------------------------------------------------------------------------------------|------------|--------------|------------|
| La1-O4                                                                                                                                                         | 2.4558(19) | La1-O2     | 2.488(2)   | Ce1-O2                                                                                                                                                             | 2.470(2)   | Ce1-O4       | 2.4403(17) |
| La1-O3                                                                                                                                                         | 2.5723(18) | La1-OW1    | 2.557(2)   | Ce1-O3                                                                                                                                                             | 2.5569(17) | Ce1-OW1      | 2.537(2)   |
| O4-La1-O2                                                                                                                                                      | 72.21(5)   | O4-La1-OW1 | 146.74(8)  | O4#1-Ce1-O4                                                                                                                                                        | 132.45(9)  | O2-Ce1-O3    | 79.09(7)   |
| O3-La1-OW1                                                                                                                                                     | 105.11(8)  | O2-La1-O1  | 119.48(8)  | O4#1-Ce1-O3                                                                                                                                                        | 125.04(7)  | O4-Ce1-OW1   | 146.56(8)  |
| Symmetry transformations used to generate equivalent atoms:<br>#1: x,-y,z; #2: -x+1,-y,-z; #3: x+1,y,z; #4: x+1,-y,z; #5: -x+1,y,-z; #6: x-1,y,z; #7: x,-y-1,z |            |            |            | Symmetry transformations used to generate equivalent atoms:<br>#1: x,-y,z; #2: x+1,-y,z; #3: x+1,y,z; #4: x-1,y,z; #5: -x+1,-y,-z; #6: -x+1,y,-z; #7: x,-y-1,z     |            |              |            |
| Compound 3                                                                                                                                                     |            |            |            | Compound 4                                                                                                                                                         |            |              |            |
| Pr1-O4                                                                                                                                                         | 2.4233(17) | Pr1-O2     | 2.444(2)   | Nd1-O3                                                                                                                                                             | 2.4122(12) | Nd1-O1       | 2.5830(19) |
| Pr1-OW1                                                                                                                                                        | 2.519(2)   | Pr1-O2#2   | 2.702(2)   | Nd1-OW1                                                                                                                                                            | 2.5063(14) | Nd1-O2#2     | 2.6889(17) |
| O4-Pr1-O4#1                                                                                                                                                    | 132.79(9)  | O4-Pr1-O2  | 72.89(5)   | O3-Nd1-O2                                                                                                                                                          | 73.14(3)   | O2-Nd1-OW1   | 141.15(4)  |
| O2-Pr1-OW1                                                                                                                                                     | 141.02(6)  | OW1-Pr1-O3 | 104.79(7)  | OW1-Nd1-OW3                                                                                                                                                        | 145.71(5)  | O3-Nd1-O4#1  | 125.72(5)  |
| Symmetry transformations used to generate equivalent atoms:<br>#1: x,-y,z; #2: -x+1,-y,-z; #3: -x+1,y,-z; #4: x,-y-1,z; #5: x+1,y,z; #6: x+1,-y,z; #7: x-1,y,z |            |            |            | Symmetry transformations used to generate equivalent atoms:<br>#1: x,-y,z; #2: -x+1,-y,-z+1; #3: x+1,-y,z; #4: x+1,y,z; #5: -x+1,y,-z+1; #6: x-1,y,z; #7: x,-y-1,z |            |              |            |
| Compound 5                                                                                                                                                     |            |            |            | Compound 6                                                                                                                                                         |            |              |            |
| Sm1-O3                                                                                                                                                         | 2.381(2)   | Sm1-O1     | 2.549(3)   | Eu1-O3                                                                                                                                                             | 2.3725(18) | Eu1-O1       | 2.535(3)   |
| Sm1-OW1                                                                                                                                                        | 2.472(2)   | Sm1-O2     | 2.685(3)   | Eu1-OW1                                                                                                                                                            | 2.463(2)   | Eu1-O2#2     | 2.668(2)   |
| O3-Sm1-O3#1                                                                                                                                                    | 133.63(11) | OW1-Sm1-O1 | 75.27(9)   | O2-Eu1-OW1#1                                                                                                                                                       | 141.30(6)  | OW1-Eu1-O4#1 | 104.73(7)  |
| O3-Sm1-O4#1                                                                                                                                                    | 126.46(8)  | O3-Sm1-OW1 | 144.75(9)  | O3-Eu1-O2                                                                                                                                                          | 73.79(5)   | O3-Eu1-O3#1  | 133.77(9)  |
| Symmetry transformations used to generate equivalent atoms:<br>#1: x,-y,z; #2: -x,-y,-z; #3: -x,y,-z; #4: x+1,y,z; #5: x+1,-y,z; #6: x-1,y,z; #7: x,-y-1,z     |            |            |            | Symmetry transformations used to generate equivalent atoms:<br>#1: x,-y+1,z; #2: -x,-y+1,-z; #3: x-1,y,z; #4: x-1,-y+1,z; #5: -x,y,-z; #6: x+1,y,z; #7: x,-y,z     |            |              |            |
| Compound 7                                                                                                                                                     |            |            |            | Compound 8                                                                                                                                                         |            |              |            |
| Gd1-O4                                                                                                                                                         | 2.3637(16) | Gd1-O3     | 2.4705(16) | Tb1-O3                                                                                                                                                             | 2.345(3)   | Tb1-O1       | 2.501(4)   |
| Gd1-OW1                                                                                                                                                        | 2.4476(18) | Gd1-O2#2   | 2.663(2)   | Tb1-OW1                                                                                                                                                            | 2.435(3)   | Tb-O2#2      | 2.666(4)   |
| O4-Gd1-O2                                                                                                                                                      | 73.97(4)   | O2-Gd1-O1  | 121.77(8)  | O3-Tb1-O2                                                                                                                                                          | 74.03(7)   | O2-Tb1-OW1#1 | 141.49(9)  |
| O2-Gd1-O3                                                                                                                                                      | 79.33(7)   | O4-Gd1-OW1 | 144.65(7)  | O3-Tb1-O4                                                                                                                                                          | 127.04(10) | OW1#1-Tb1-O4 | 104.59(11) |
| Symmetry transformations used to generate equivalent atoms:<br>#1: x,-y,z; #2: -x+1,-y,-z+2; #3: x,-y+1,z; #4: -x+1,y,-z+2; #5: x+1,y,z; #6: x-1,y,z           |            |            |            | Symmetry transformations used to generate equivalent atoms:<br>#1: x,-y+1,z; #2: -x,-y+1,-z; #3: -x,y,-z; #4: x,-y,z; #5: x+1,y,z; #6: x-1,y,z                     |            |              |            |
| Compound 9                                                                                                                                                     |            |            |            | Compound 10                                                                                                                                                        |            |              |            |
| Dy1-O4                                                                                                                                                         | 2.3351(14) | Dy1-O2     | 2.340(2)   | Ho1-O4                                                                                                                                                             | 2.3239(12) | Ho1-O2       | 2.3292(18) |
| Dy1-OW1                                                                                                                                                        | 2.4207(16) | Dy1-O2#2   | 2.668(2)   | Ho1-OW1                                                                                                                                                            | 2.4095(14) | Ho1-O2#2     | 2.6733(18) |
| O4#1-Dy1-O4                                                                                                                                                    | 133.99(7)  | O2-Dy1-OW1 | 141.39(5)  | O4-Ho1-O4#1                                                                                                                                                        | 133.92(6)  | O2-Ho1-OW1#1 | 141.50(4)  |



|                                                                                                                                                                    |            |             |            |                                                                                                                                                                        |            |              |            |
|--------------------------------------------------------------------------------------------------------------------------------------------------------------------|------------|-------------|------------|------------------------------------------------------------------------------------------------------------------------------------------------------------------------|------------|--------------|------------|
| O2-Dy1-O3                                                                                                                                                          | 79.16(6)   | OW1-Dy1-O3  | 104.62(6)  | O4-Ho1-O2                                                                                                                                                              | 74.42(4)   | OW1-Ho1-O3#1 | 104.67(5)  |
| Symmetry transformations used to generate equivalent atoms:<br>#1: x,-y+1,z; #2: -x+1,-y+1,-z; #3: x+1,-y+1,z; #4: x+1,y,z; #5: -x+1,y,-z; #6: x-1,y,z; #7: x,-y,z |            |             |            | Symmetry transformations used to generate equivalent atoms:<br>#1: x,-y,z; #2: -x+1,-y,-z+2; #3: x-1,y,z; #4: -x+1,y,-z+2; #5: x+1,y,z; #6: x,-y+1,z                   |            |              |            |
| Compound 11                                                                                                                                                        |            |             |            | Compound 12                                                                                                                                                            |            |              |            |
| Er1-O4                                                                                                                                                             | 2.3116(17) | Er1-OW1     | 2.399(2)   | Tm1-O1                                                                                                                                                                 | 2.422(4)   | Tm1-O4       | 2.410(3)   |
| Er1-O3                                                                                                                                                             | 2.4284(19) | Er1-O2#2    | 2.689(3)   | Tm1-O3                                                                                                                                                                 | 2.297(3)   | Tm1-OW1      | 2.385(3)   |
| O4-Er1-OW1                                                                                                                                                         | 143.90(7)  | O4#1-Er1-O3 | 128.09(7)  | O2-Tm1-O3                                                                                                                                                              | 74.62(8)   | O3-Tm1-O3#2  | 133.16(14) |
| O4-Er1-O2                                                                                                                                                          | 74.54(5)   | OW1-Er1-O3  | 104.72(8)  | O3-Tm1-OW1                                                                                                                                                             | 143.92(11) | O3-Tm1-O4#2  | 128.43(10) |
| Symmetry transformations used to generate equivalent atoms:<br>#1: x,-y,z; #2: -x+2,-y,-z+1; #3: -x+1,-y,-z+1; #4: -x+2,y,-z+1; #5: x,-y+1,z                       |            |             |            | Symmetry transformations used to generate equivalent atoms:<br>#1: -x+1,-y+1,-z+1; #2: x,-y+1,z; #3: x-1,y,z; #4: x+1,y,z; #5: x+1,-y+1,z; #6: -x+1,y,-z+1; #7: x,-y,z |            |              |            |
| Compound 13                                                                                                                                                        |            |             |            | Compound 14                                                                                                                                                            |            |              |            |
| Yb1-O3                                                                                                                                                             | 2.349(3)   | Yb1-O4      | 2.414(3)   | Lu1-O1                                                                                                                                                                 | 2.247(4)   | Lu1-O4       | 2.389(4)   |
| Yb1-O6                                                                                                                                                             | 2.283(3)   | Yb1-OW1     | 2.366(3)   | Lu1-OW1                                                                                                                                                                | 2.348(4)   | Lu1-O6       | 2.284(4)   |
| O1-Yb1-O6                                                                                                                                                          | 75.17(14)  | O6-Yb1-O5   | 122.19(13) | O1-Lu1-O6                                                                                                                                                              | 74.53(15)  | O6-Lu1-O5    | 121.85(14) |
| O6-Yb1-OW2                                                                                                                                                         | 141.20(13) | O1-Yb1-O3   | 132.72(13) | O2#2-Lu1-OW2                                                                                                                                                           | 144.77(16) | O5-Lu1-OW1   | 76.39(15)  |
| Symmetry transformations used to generate equivalent atoms:<br>#1: -x+1,-y+2,-z+1; #2: -x+2,-y+1,-z+1; #3: x,y,z+1; #4: x,y,z-1                                    |            |             |            | Symmetry transformations used to generate equivalent atoms:<br>#1: -x+1,-y+2,-z+1; #2: -x+2,-y+1,-z+1; #3: x,y,z+1; #4: x,y,z-1                                        |            |              |            |

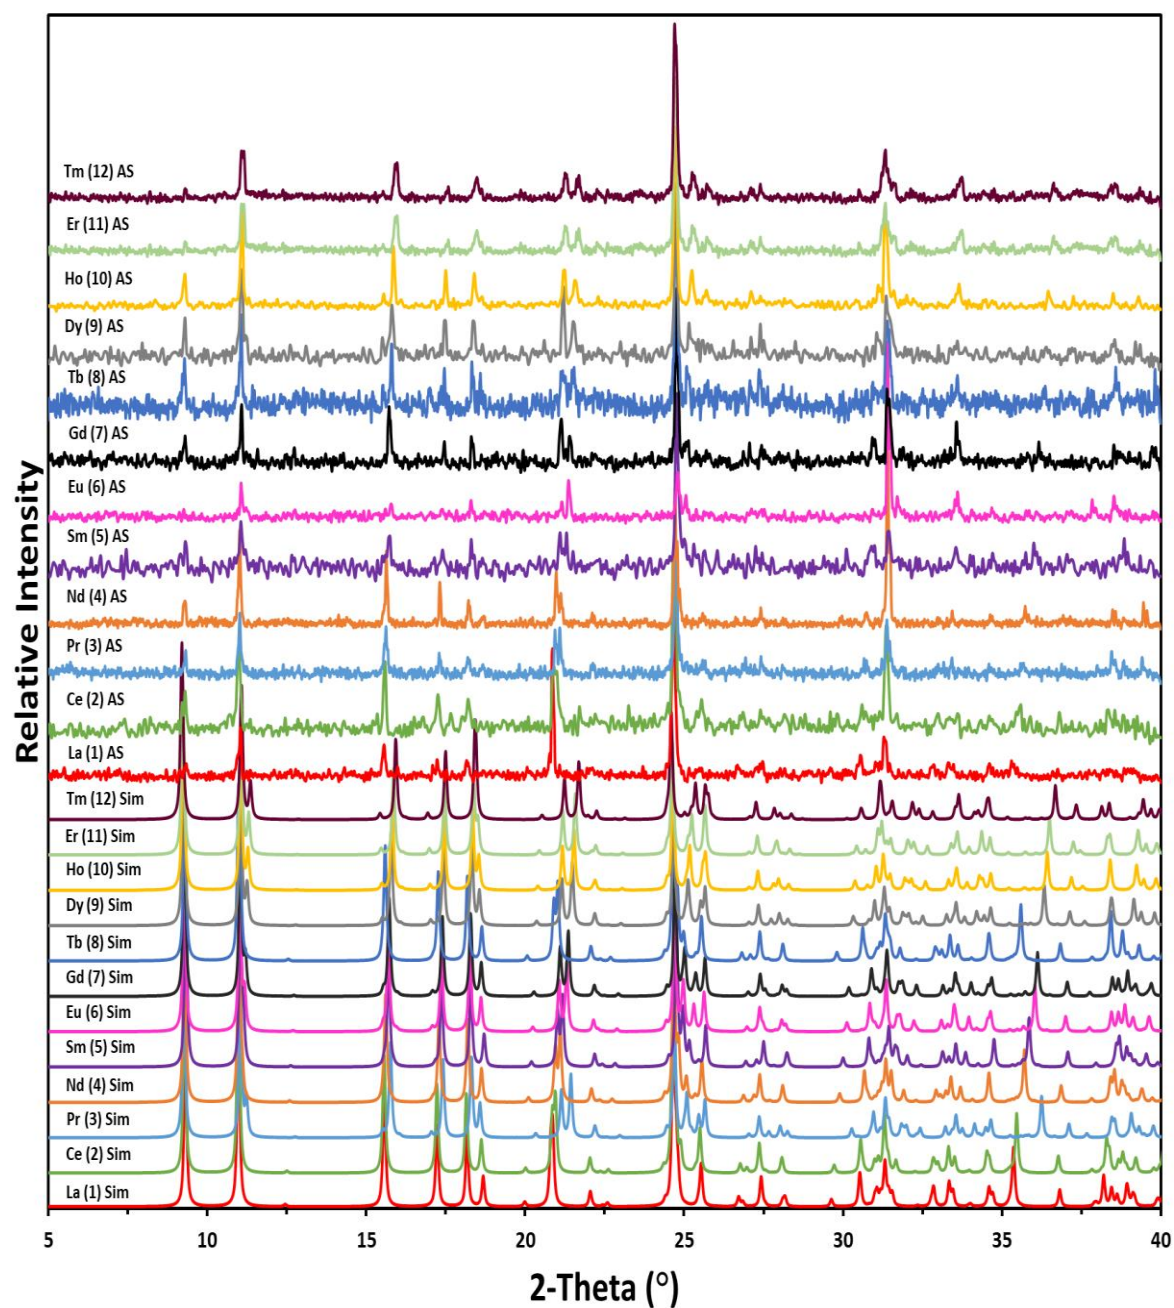

Figure S3. Simulated (Sim) and as-synthesized (AS) PXRD patterns for compounds 1 – 12.

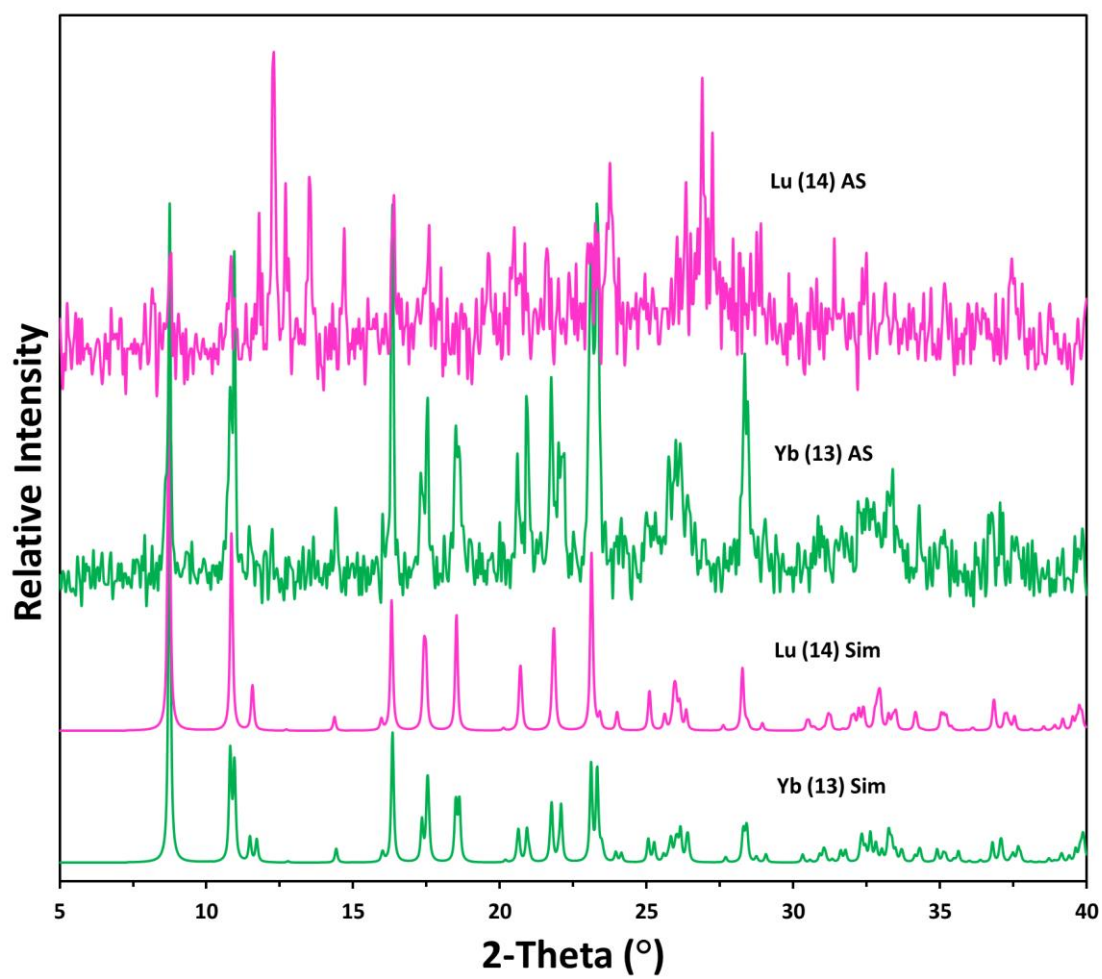

Figure S4. Simulated (Sim) and as-synthesized (AS) PXRD patterns for compounds **13** and **14**.

Table S5. Structures in which F•••F interactions were identified in research article.

| CSD Code | Reference     | F•••F distance (Å) | $\angle C-F\cdots F$ ( $\theta_1; \theta_2$ ) ° | Type of F•••F interaction |
|----------|---------------|--------------------|-------------------------------------------------|---------------------------|
| ADUQUL   | 1             | 2.924              | 148.56; 116.47                                  | II                        |
|          |               | 2.846              | 160.65; 130.25                                  | II                        |
| ATEKIV   | 2             | 2.866              | 100.02; 100.02                                  | I                         |
| AVIRAZ   | 3             | 2.646              | 146.85; 146.85                                  | I                         |
|          |               | 2.782              | 175.18; 175.18                                  | I                         |
|          |               | 2.796              | 146.62; 122.12                                  | Quasi type I/type II      |
|          |               | 2.833              | 158.64; 121.20                                  | II                        |
|          |               | 2.837              | 98.96; 98.96                                    | I                         |
|          |               | 2.850              | 122.34; 101.76                                  | Quasi type I/type II      |
|          |               | 2.862              | 138.66; 91.80                                   | II                        |
| 2.901    | 138.49; 95.86 | II                 |                                                 |                           |
| AVIRED   | 3             | 2.814              | 175.49; 116.90                                  | II                        |
|          |               | 2.855              | 148.22; 99.62                                   | II                        |
|          |               | 2.856              | 164.26; 152.82                                  | I                         |
|          |               | 2.860              | 150.61; 139.73                                  | I                         |
|          |               | 2.883              | 170.44; 98.14                                   | II                        |
| AVIRIH   | 3             | 2.753              | 167.55; 163.61                                  | I                         |
|          |               | 2.816              | 175.28; 116.81                                  | II                        |
|          |               | 2.838              | 149.76; 100.31                                  | II                        |
|          |               | 2.859              | 149.74; 137.60                                  | I                         |
|          |               | 2.923              | 114.19; 114.19                                  | I                         |
| AVIRON   | 3             | 2.809              | 175.73; 117.05                                  | II                        |
|          |               | 2.838              | 148.51; 99.42                                   | II                        |
|          |               | 2.842              | 150.49; 139.47                                  | I                         |
|          |               | 2.851              | 164.65; 151.87                                  | I                         |
|          |               | 2.901              | 170.13; 98.60                                   | II                        |
| AVIRUT   | 3             | 2.836              | 149.89; 131.20                                  | Quasi type I/type II      |
| AWIWIM   | 4             | 2.880              | 130.46; 117.59                                  | I                         |
| AWIXEJ01 | 4             | 2.855              | 124.66; 110.11                                  | I                         |
| BAPMEN   | 5             | 2.934              | 172.54; 107.76                                  | II                        |
| BAPMOX   | 5             | 2.860              | 86.00; 86.00                                    | I                         |
|          |               | 2.877              | 122.17; 85.41                                   | II                        |

|          |    |                |                                                                           |                                              |
|----------|----|----------------|---------------------------------------------------------------------------|----------------------------------------------|
| BEKDUR   | 6  | 2.824          | 123.14; 123.14                                                            | I                                            |
| BEKDUR01 | 7  | 2.815          | 123.48; 123.48<br>between interstitial<br>CF <sub>3</sub> SO <sub>3</sub> | I                                            |
| BEMSAO01 | 8  | 2.918          | 108.74; 108.74                                                            | I                                            |
| BEMSAO02 | 8  | 2.856          | 109.56; 109.56                                                            | I                                            |
| BEMSAO04 | 8  | 2.858          | 111.82; 110.12                                                            | I                                            |
| BODJUA   | 9  | 2.729          | 160.93; 160.93<br>between interstitial<br>CF <sub>3</sub> SO <sub>3</sub> | I                                            |
| CEPKUG   | 10 | 2.939          | 109.30; 104.87                                                            | I                                            |
| CEYDUG   | 11 | 2.576          | 162.60; 162.60                                                            | I                                            |
| CUVWOG   | 12 | 2.873          | 93.74; 93.74                                                              | I                                            |
| CUVXEX   | 12 | 2.768<br>2.916 | 168.72; 106.37<br>136.43; 99.55                                           | II<br>II                                     |
| CUVXIB   | 12 | 2.929          | 137.59; 137.59                                                            | I                                            |
| CUWXIC   | 13 | 2.857          | 122.94; 118.32                                                            | I                                            |
| DAPPER   | 14 | 2.667          | 126.23; 126.23                                                            | I                                            |
| DULFIA   | 15 | 2.780          | 137.69; 137.69                                                            | I                                            |
| DULFIA01 | 16 | 2.774          | 138.52; 138.52                                                            | I                                            |
| GIVBAR   | 17 | 2.719          | 134.96; 134.96                                                            | I                                            |
| HADMAD01 | 18 | 2.693          | 157.93; 144.20                                                            | I                                            |
| HAFPOV   | 19 | 2.935          | 102.35; 102.13                                                            | I                                            |
| HALLOX   | 20 | 2.737<br>2.938 | 138.02; 119.14<br>102.78; 93.84                                           | Quasi type I/type II<br>I                    |
| HIJWU*   | 21 | 2.847<br>2.934 | 150.46; 135.39<br>137.76; 116.18                                          | Quasi type I/type II<br>Quasi type I/type II |
| HIVJEB   | 22 | 2.894          | 98.83; 98.83                                                              | I                                            |
| HIZJEG   | 23 | 2.936          | 119.91; 115.75                                                            | I                                            |
| HOLRIL   | 24 | 2.795          | 137.69; 128.09                                                            | I                                            |
| IXACUZ*  | 25 | 2.843<br>2.935 | 175.77; 143.86<br>174.60; 127.49                                          | II<br>II                                     |
| KEVVIQ   | 26 | 2.875<br>2.895 | 125.96; 122.02<br>109.93; 109.93                                          | I<br>I                                       |
| KIDCOR   | 27 | 2.549          | 155.99; 155.99                                                            | I                                            |

|         |    |        |                |                      |
|---------|----|--------|----------------|----------------------|
| KIPJIE  | 28 | 2.793  | 152.29; 104.90 | II                   |
|         |    | 2.835  | 117.30; 117.30 | I                    |
| LOWLIU  | 29 | 2.741  | 157.34; 95.44  | II                   |
|         |    | 2.817  | 166.80; 86.87  | II                   |
|         |    | 2.858  | 127.74; 122.21 | I                    |
|         |    | 2.879  | 139.07; 95.48  | II                   |
| MIYZIF  | 30 | 2.830  | 115.75; 115.75 | I                    |
| MULQIT* | 31 | 2.648  | 158.79; 123.54 | II                   |
| MULQOZ* | 31 | 2.719  | 140.91; 111.91 | Quasi type I/type II |
|         |    | 2.863  | 139.29; 119.25 | Quasi type I/type II |
| MULRAM  | 31 | 2.904  | 116.59; 116.59 | I                    |
| NUWCAK  | 32 | 2.786  | 141.03; 141.03 | I                    |
|         |    | 2.876  | 128.92; 128.92 | I                    |
| NUWHUK  | 33 | 2.864  | 123.03; 123.03 | I                    |
|         |    | 2.867  | 148.94; 148.94 | I                    |
| NUWJAS  | 33 | 2.939  | 122.78; 122.78 | I                    |
| NUWJEW  | 33 | 2.799  | 110.27; 110.27 | I                    |
|         |    | 2.837  | 167.00; 132.22 | II                   |
| OCULIK  | 34 | 2.937  | 79.13; 79.13   | I                    |
| OJEDEN  | 35 | 2.779  | 144.04; 144.04 | I                    |
| PUSQOK  | 36 | 2.730  | 161.92; 117.97 | II                   |
| PUSREB  | 36 | 2.829  | 125.08; 112.26 | I                    |
|         |    | 2.860* | 120.19; 113.33 | I                    |
| PUSRIF  | 36 | 2.616  | 154.68; 154.68 | I                    |
| PUSROL  | 36 | 2.706  | 126.08; 111.07 | Quasi type I/type II |
| PUSSAY  | 36 | 2.781  | 128.33; 128.33 | I                    |
| PUSSIG  | 36 | 2.904* | 140.36; 120.51 | Quasi type I/type II |
| PUSSOM  | 36 | 2.829  | 150.97; 150.97 | I                    |
| PUSSUS  | 36 | 2.873  | 168.21; 167.24 | I                    |
| PUSTAZ  | 36 | 2.844  | 134.49; 122.16 | I                    |
| QAQGUL  | 37 | 2.870  | 152.29; 152.29 | I                    |
| QAQHEW  | 37 | 2.790  | 118.99; 96.88  | Quasi type I/type II |
|         |    | 2.902  | 151.08; 105.80 | II                   |
|         |    | 2.931  | 148.32; 90.26  | II                   |
| SAZROD  | 38 | 2.872* | 139.59; 112.58 | Quasi type I/type II |

|         |    |        |                |                      |
|---------|----|--------|----------------|----------------------|
| SAZRUI  | 38 | 2.557* | 143.26; 143.26 | I                    |
|         |    | 2.719* | 131.00; 96.33  | II                   |
| SIWBUX  | 39 | 2.544  | 148.73; 148.73 | I                    |
| SIWCAE  | 39 | 2.860  | 150.27; 150.27 | I                    |
| TEZSEZ  | 40 | 2.743  | 167.74; 128.48 | II                   |
| TOZDUJ  | 41 | 2.863* | 155.48; 111.26 | II                   |
| TOZ FAR | 41 | 2.914  | 118.19; 99.29  | Quasi type I/type II |
| TUGGUY  | 42 | 2.780  | 131.81; 117.64 | I                    |
| URESIV  | 43 | 2.743* | 150.68; 141.36 | I                    |
|         |    | 2.743* | 134.16; 124.86 | I                    |
|         |    | 2.794* | 102.62; 102.62 | I                    |
| VEZPAT  | 44 | 2.877  | 135.11; 117.13 | Quasi type I/type II |
| VUNXEI  | 45 | 2.912  | 160.84; 120.42 | II                   |
|         |    | 2.939  | 158.26; 105.05 | II                   |
| WIFBAP  | 46 | 2.884  | 103.84; 103.84 | I                    |
| WILKAF  | 47 | 2.787  | 115.59; 115.59 | I                    |
| XALPIJ  | 48 | 2.744  | 128.14; 128.14 | I                    |
|         |    | 2.908  | 158.01; 158.01 | I                    |
| XALPOP  | 48 | 2.555  | 132.16; 132.16 | I                    |
|         |    | 2.662  | 176.45; 155.78 | I                    |
|         |    | 2.712  | 161.90; 161.90 | I                    |
| XIRZIK  | 49 | 2.880  | 142.73; 119.85 | Quasi type I/type II |
| XIRZOQ  | 49 | 2.903  | 141.52; 118.27 | Quasi type I/type II |
| XIRZUW  | 49 | 2.924  | 140.11; 114.72 | Quasi type I/type II |
| YEMNUA  | 50 | 2.725  | 154.61; 152.85 | I                    |

\* - Disordered atoms are involved in F•••F interaction

Table S6. F•••F interactions in series 1 and 2.

| Series 1     | F1•••F3 distance (Å)    | Sum of vdW radii (%) | type of X•••X interaction | F1•••F1 distance (Å) | Sum of vdW radii (%)    | type of X•••X interaction |
|--------------|-------------------------|----------------------|---------------------------|----------------------|-------------------------|---------------------------|
| 1 – La(III)  | 2.596(3)                | 88.3                 | I                         | 2.896(3)             | 98.5                    | I                         |
| 2 – Ce(III)  | 2.591(2)                | 88.1                 | I                         | 2.898(3)             | 98.6                    | I                         |
| 3 – Pr(III)  | 2.584(3)                | 87.9                 | I                         | 2.893(3)             | 98.4                    | I                         |
| 4 – Nd(III)  | 2.5694(19)              | 87.4                 | I                         | 2.896(3)             | 98.5                    | I                         |
| 5 – Sm(III)  | 2.540(3)                | 86.4                 | I                         | 2.884(5)             | 98.1                    | I                         |
| 6 – Eu(III)  | 2.544(3)                | 86.5                 | I                         | 2.896(3)             | 98.5                    | I                         |
| 7 – Gd(III)  | 2.533(2)                | 86.2                 | I                         | 2.900(3)             | 98.6                    | I                         |
| 8 – Tb(III)  | 2.528(3)                | 86.0                 | I                         | 2.913(5)             | 99.1                    | I                         |
| 9 – Dy(III)  | 2.517(2)                | 85.6                 | I                         | 2.911(3)             | 99.0                    | I                         |
| 10 – Ho(III) | 2.510(2)                | 85.4                 | I                         | 2.918(3)             | 99.3                    | I                         |
| 11 – Er(III) | 2.501(3)                | 85.1                 | I                         | 2.929(3)             | 99.6                    | I                         |
| 12 – Tm(III) | 2.4951(1)               | 84.9                 | I                         | 2.9385(1)            | 99.9                    | I                         |
| Series 2     | F2•••F5(A) distance (Å) | Sum of vdW radii (%) | F1•••F4(A) distance (Å)   | Sum of vdW radii (%) | F2•••F6(A) distance (Å) | Sum of vdW radii (%)      |
| 13 – Yb(III) | 2.850(8)                | 96.9                 | 2.635                     | 89.6                 | 2.730(9)                | 92.9                      |
| 14 – Lu(III) | 2.907(9)                | 98.9                 | 2.604                     | 88.6                 | 2.743(9)                | 93.3                      |

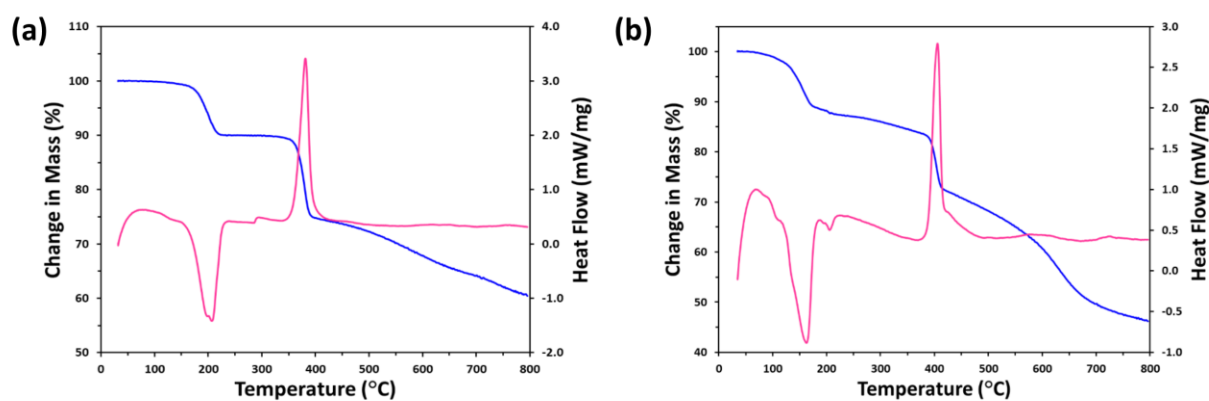

Figure S5. TGA (blue) – DSC (pink) scans of compounds (a) 5 (Sm-TFTA) and (b) 13 (Yb-TFTA) under helium atmosphere.



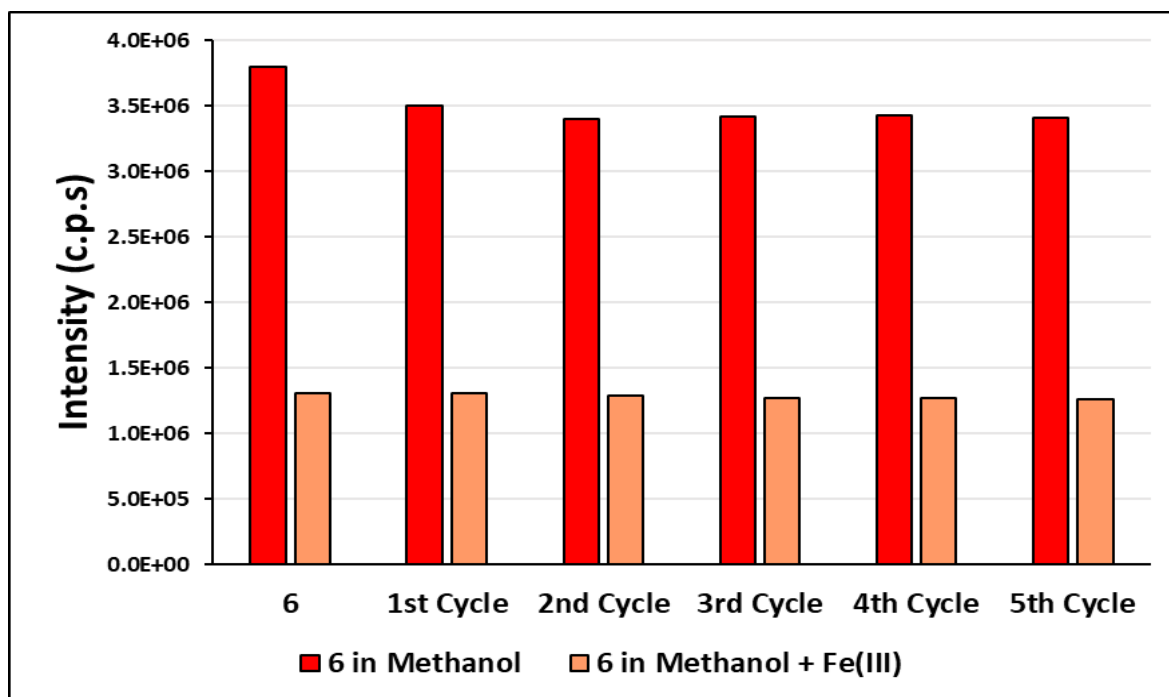Figure S6. Recyclability toward  $\text{Fe}^{3+}$  sensing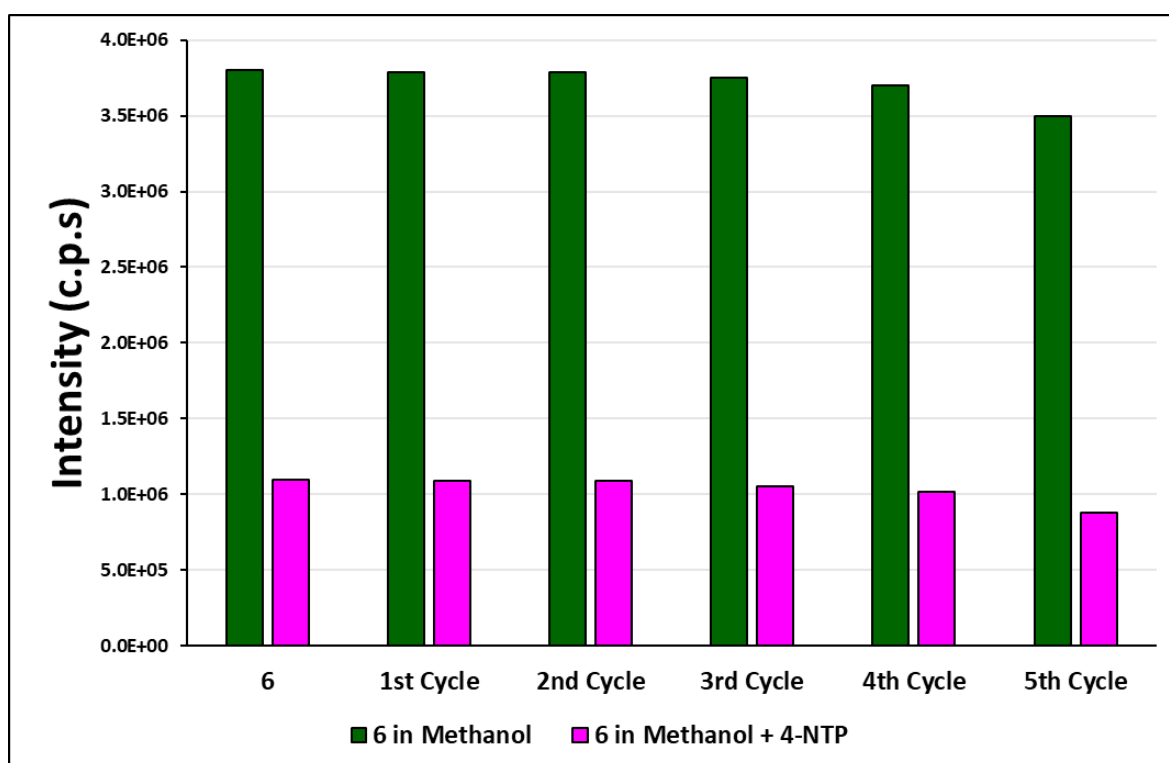

Figure S7. Recyclability toward 4-NTP sensing

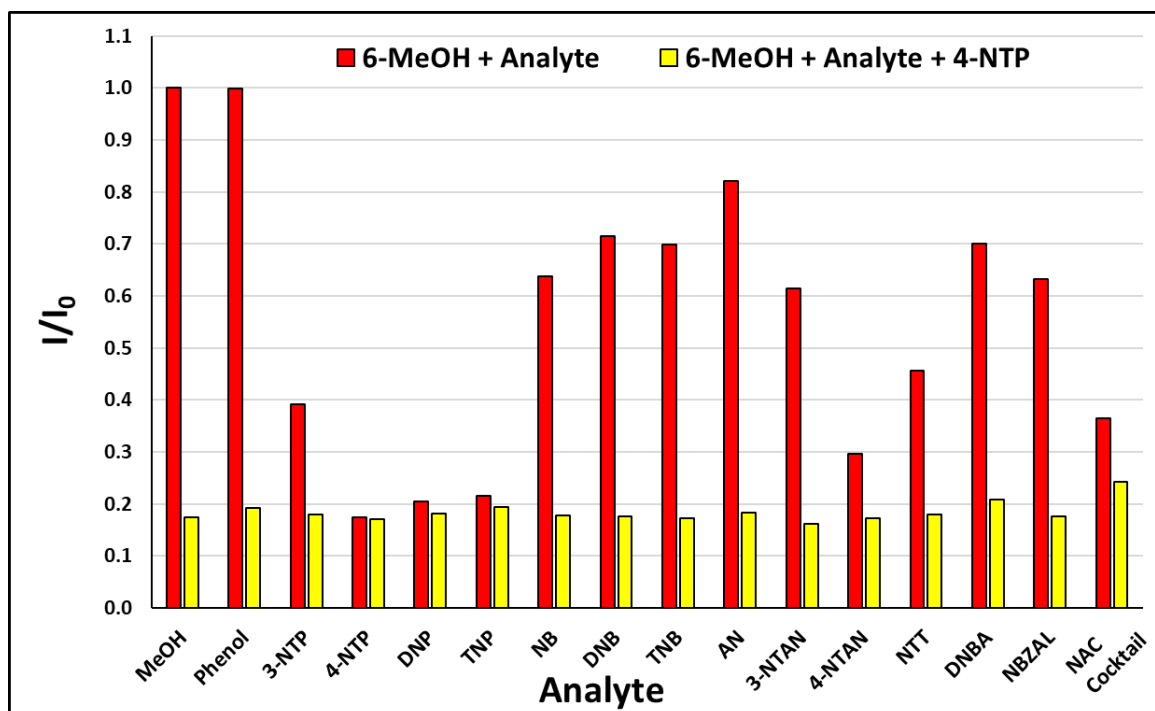

Figure S8. Relative fluorescence of **6**-MeOH in the presence of varying NAC solutions (red) and NACs mixed with 4-NTP upon 317 nm excitation (yellow).

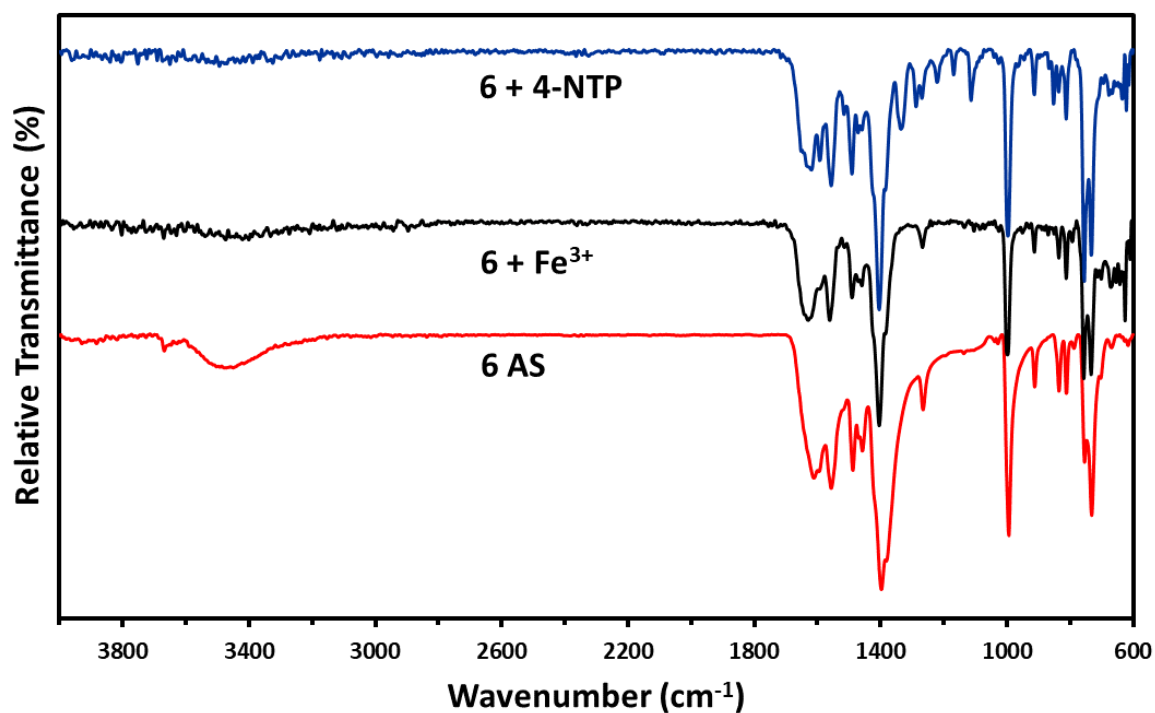

Figure S9. FTIR spectra of as-synthesized (AS)  $\{[\text{Eu}_2(\text{TFTA})_3(\text{H}_2\text{O})_4] \cdot 2\text{H}_2\text{O}\}_n$  (**6**) upon interaction with  $\text{FeCl}_3$  and 4-NTP, respectively.

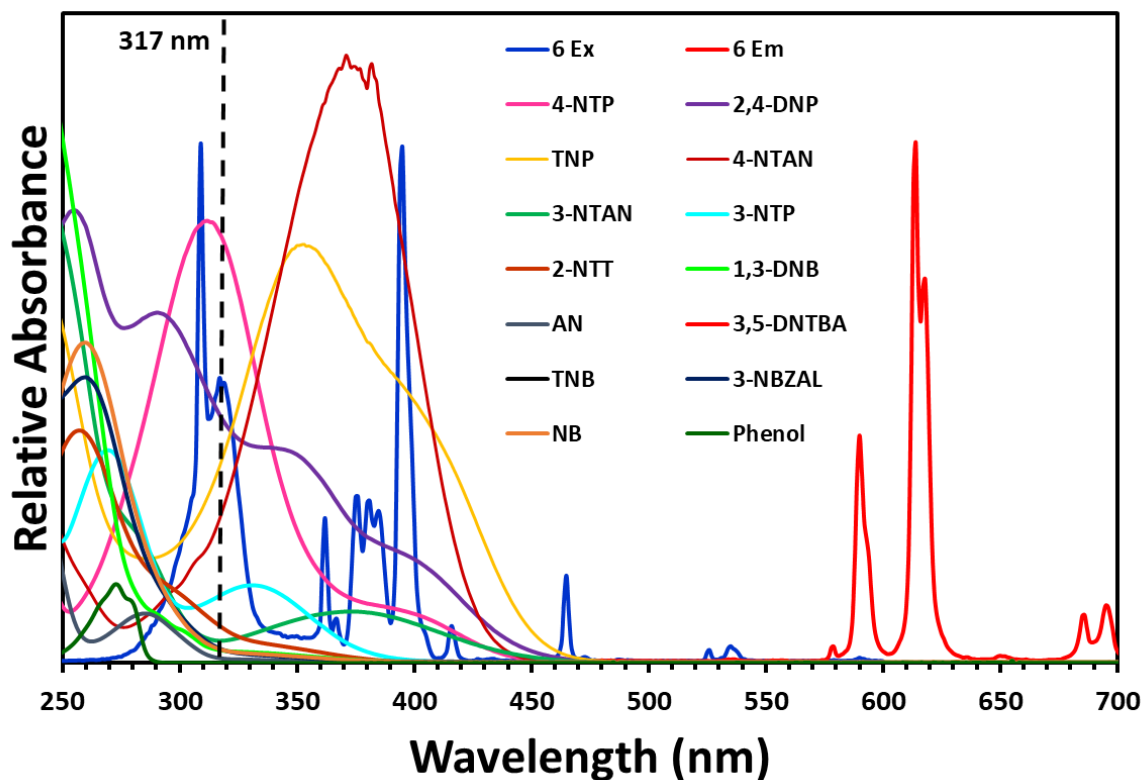

Figure S10. UV-Vis spectra of methanol solutions containing NACs and solid-state excitation and emission spectrum of **6** ( $\lambda_{em} = 617$  nm;  $\lambda_{ex} = 317$  nm).

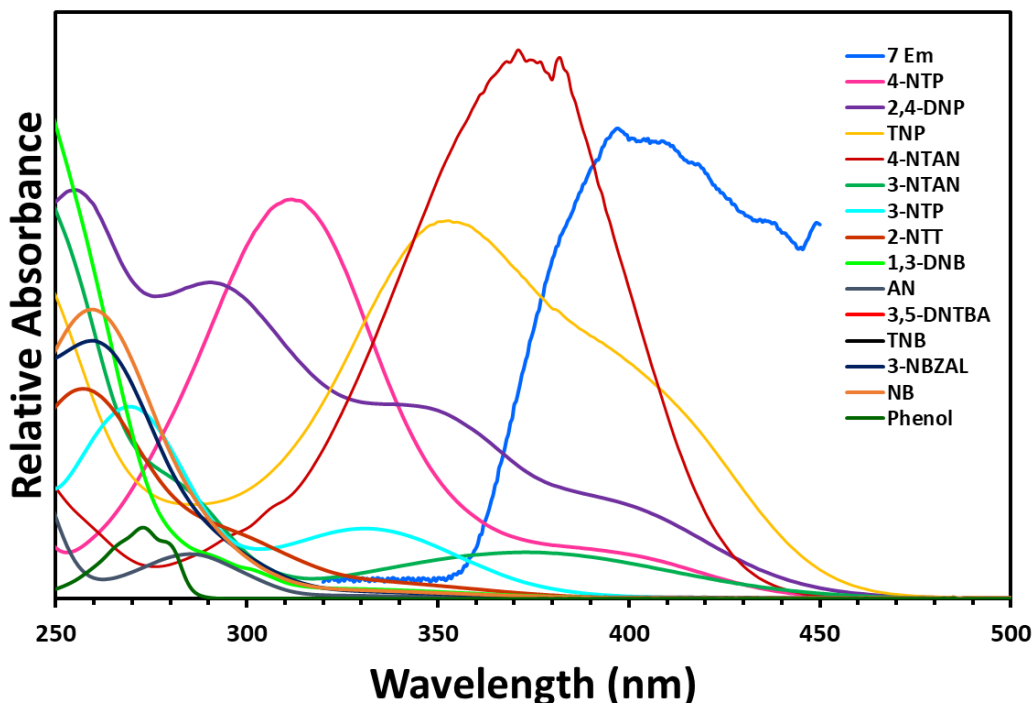

Figure S11. Absorbance spectra of nitroaromatic analytes and emission spectrum of  $\{[\text{Gd}(\text{TFTA})_{1.5}(\text{H}_2\text{O})_2] \cdot \text{H}_2\text{O}\}_n$  (**7**). **7 Em** is from the lowest triplet state of the ligand (ligand phosphorescence).

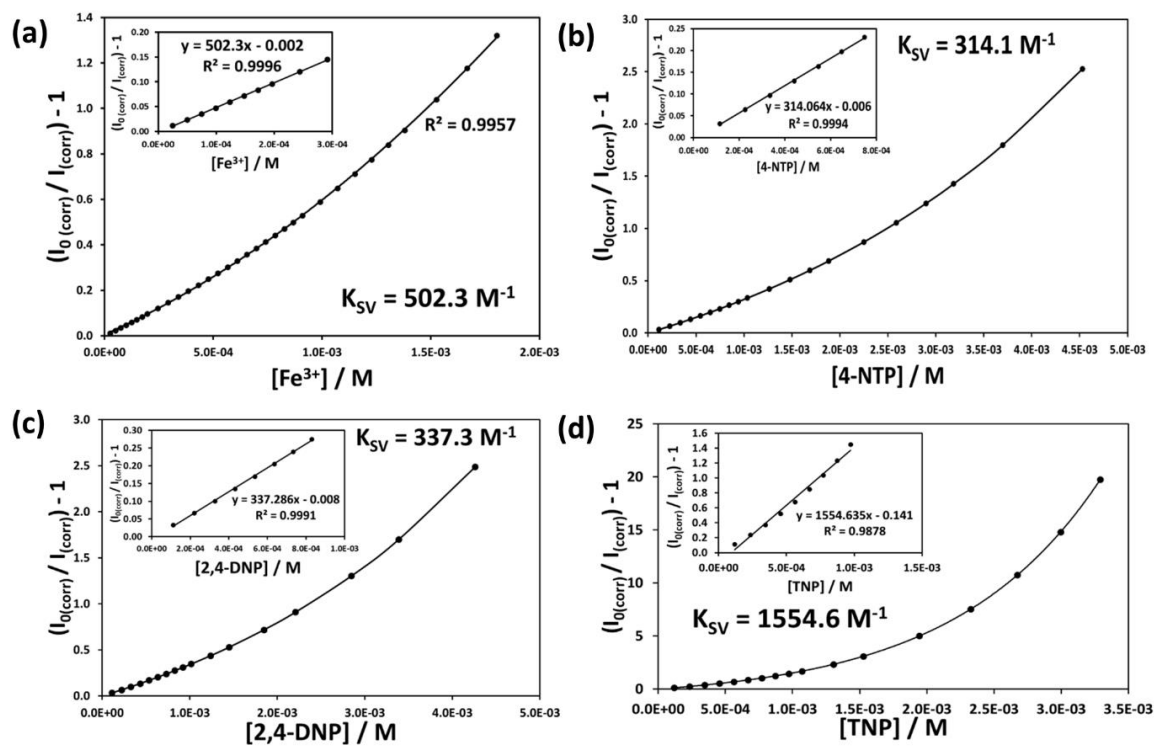

Figure S12. Corrected S-V plots for (a)  $\text{Fe}^{3+}$  (b) 4-NTP (c) 2,4-DNP (d) TNP in

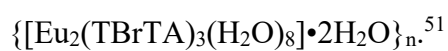

Table S7. HOMO and LUMO energies of TFTA ligand, TBrTA ligand and nitroaromatic compounds.

| Ligand or NAC | HOMO (eV) | LUMO (eV) | Band Gap (eV) |
|---------------|-----------|-----------|---------------|
| TFTA          | -0.30541  | -0.12486  | 0.18055       |
| TBrTA         | -0.27272  | -0.08087  | 0.19185       |
| 4-NTP         | -0.26811  | -0.10088  | 0.16723       |
| DNP           | -0.29421  | -0.13908  | 0.15513       |
| TNP           | -0.31585  | -0.15948  | 0.15637       |
| 4-NTAN        | -0.22945  | -0.07167  | 0.15778       |
| 3-NTP         | -0.26267  | -0.10690  | 0.15577       |
| 2-NTT         | -0.27798  | -0.10242  | 0.17556       |
| 3-NTAN        | -0.23743  | -0.10126  | 0.13617       |
| NBZAL         | -0.28957  | -0.12224  | 0.16733       |
| NB            | -0.29021  | -0.10737  | 0.18284       |
| TNB           | -0.34394  | -0.15203  | 0.19191       |
| DNBA          | -0.32266  | -0.14775  | 0.17491       |
| DNB           | -0.32098  | -0.13238  | 0.18860       |
| AN            | -0.21002  | -0.01111  | 0.19891       |
| Phenol        | -0.23252  | -0.01870  | 0.21382       |

## References

1. Blake, A. J.; Champness, N. R.; Howdle, S. M.; Morley, K. S.; Webb, P. B.; Wilson, C., Silver(I)-thioether coordination polymers constructed using asymmetric diketonate anions. *CrystEngComm* **2002**, 4 (16), 88-92.
2. Li, B.; Fan, H.-T.; Yang, Y.-H.; Wang, C.-C., Halogen Bonding in the Assembly of Silver(I)-ethynide Complexes with 1-Iodo-3,5-bis(prop-2-ynyloxy)benzene. *J. Cluster Sci.* **2016**, 27 (4), 1171-1179.
3. Eliseeva, S. V.; Pleshkov, D. N.; Lyssenko, K. A.; Lepnev, L. S.; Bunzli, J. C.; Kuzmina, N. P., Highly luminescent and triboluminescent coordination polymers assembled from lanthanide beta-diketonates and aromatic bidentate O-donor ligands. *Inorg. Chem.* **2010**, 49 (20), 9300-9311.
4. Koreneva, O. V.; Romanenko, G. V.; Shvedenkov, Y. G.; Ikorskii, V. N.; Ovcharenko, V. I., Molecular magnets based on M(hfac)<sub>2</sub> and spin-labeled nitrile. *Polyhedron* **2003**, 22 (14-17), 2487-2497.
5. Aubert, E.; Abboud, M.; Doudouh, A.; Durand, P.; Peluso, P.; Ligresti, A.; Vigolo, B.; Cossu, S.; Pale, P.; Mamane, V., Silver(i) coordination polymers with 3,3',5,5'-tetrasubstituted 4,4'-bipyridine ligands: towards new porous chiral materials. *RSC Advances* **2017**, 7 (12), 7358-7367.
6. Dong, Y.-B.; Cheng, J.-Y.; Ma, J.-P.; Wang, H.-Y.; Huang, R.-Q.; Guo, D.-S.; Smith, M. D., One-dimensional coordination polymers generated from an oxadiazole-containing N,N'-bipyridine-type ligand and inorganic salts. *Solid State Sciences* **2003**, 5 (8), 1177-1186.

7. Huang, Z.; Du, M.; Song, H.-B.; Bu, X.-H., Effect of Anions on the Framework Formation of Novel Ag<sup>I</sup> Coordination Polymers with Angular Bridging Ligands. *Cryst. Growth Des.* **2004**, *4* (1), 71-78.
8. Fokin, S.; Ovcharenko, V.; Romanenko, G.; Ikorskii, V., Problem of a wide variety of products in the Cu(hfac)<sub>2</sub>-nitroxide system. *Inorg. Chem.* **2004**, *43* (3), 969-977.
9. Wang, X.-J.; Gui, L.-C.; Ni, Q.-L.; Liao, Y.-F.; Jiang, X.-F.; Tang, L.-H.; Zhang, Z.; Wu, Q.,  $\pi$ -Stacking induced complexes with Z-shape motifs featuring a complementary approach between electron-rich arene diamines and electron-deficient aromatic N-heterocycles. *CrystEngComm* **2008**, *10* (8), 1003-1010.
10. Thuéry, P.; Harrowfield, J., Complexes of Uranyl Ions with Aromatic Di- and Tetracarboxylates Involving [Ni(bipy)<sub>n</sub>]<sup>2+</sup> (n= 2, 3) Counterions. *Eur. J. Inorg. Chem.* **2017**, *2017* (46), 5451-5460.
11. Zhang, L.; Ling, Y.; Peng, F.; Du, M., Anion-tuned self-assembly of zinc(II)-fluconazole complexes: Crystal structures, luminescent and thermal properties. *J. Mol. Struct.* **2007**, *829* (1-3), 161-167.
12. Pachfule, P.; Dey, C.; Panda, T.; Vanka, K.; Banerjee, R., Structural Diversity in Partially Fluorinated Metal Organic Frameworks (F-MOFs) Composed of Divalent Transition Metals, 1,10-Phenanthroline, and Fluorinated Carboxylic Acid. *Cryst. Growth Des.* **2010**, *10* (3), 1351-1363.
13. Pachfule, P.; Dey, C.; Panda, T.; Banerjee, R., Synthesis and structural comparisons of five new fluorinated metal organic frameworks (F-MOFs). *CrystEngComm* **2010**, *12* (5), 1600-1609.
14. Jiang, L.; Meng, X. R.; Xiang, H.; Ju, P.; Zhong, D. C.; Lu, T. B., Variations of structures and gas sorption properties of three coordination polymers induced by fluorine atom positions in azamacrocyclic ligands. *Inorg. Chem.* **2012**, *51* (3), 1874-1880.
15. Lutz, M.; Schreurs, A. M.; Spek, A. L.; Moelands, M. A.; Klein Gebbink, R. J., catena-Poly[[bis(acetonitrile- $\kappa$ N)manganese(II)]-bis( $\mu$ -trifluoromethanesulfonato- $\kappa^2$ O:O')]. *Acta Crystallogr. C* **2010**, *66* (Pt 1), m9-m12.
16. Riedel, P. J.; Arulsamy, N.; Mehn, M. P., Facile Routes to Manganese(II) Triflate Complexes. *Inorg. Chem. Commun.* **2011**, *14* (5), 734-737.
17. Khavasi, H. R.; Rahimi, N., Fluorine-Substituted Ligands Induce Structural Diversity of Coordination Compounds. *ChemistrySelect* **2017**, *2* (34), 11314-11321.
18. Taylor, M. K.; Runcevski, T.; Oktawiec, J.; Gonzalez, M. I.; Siegelman, R. L.; Mason, J. A.; Ye, J.; Brown, C. M.; Long, J. R., Tuning the Adsorption-Induced Phase Change in the Flexible Metal-Organic Framework Co(bdp). *J. Am. Chem. Soc.* **2016**, *138* (45), 15019-15026.
19. Seidel, Rüdiger W.; Goddard, R.; Hoch, C.; Opperl, Iris M., Structural Diversity of Metallosupramolecular Assemblies from Cu(phen)<sup>2+</sup> (phen = 1,10-Phenanthroline) Building Blocks and 4,4'-Bipyridine. *Z. Anorg. Allg. Chem.* **2011**, *637* (11), 1545-1554.
20. Awaleh, M. O.; Farah, I. G.; Dirieh, E. S.; Maris, T.; Bouh, S. M., Synthesis, crystal structures and thermal analysis of two new coordination polymers. *Comptes Rendus Chimie* **2011**, *14* (11), 991-996.
21. Krisyuk, V. V.; Baidina, I. A.; Basova, T. V.; Bulusheva, L. G.; Igumenov, I. K., Self-Assembly of Coordination Polymers from Volatile Pd<sup>II</sup> and Pb<sup>II</sup>  $\beta$ -Diketonate Derivatives through Metallophilic Interactions. *Eur. J. Inorg. Chem.* **2013**, *2013* (33), 5738-5745.
22. Yamaguchi, T.; Yamazaki, F.; Ito, T., A short platinum to silver dative bond and its application in the construction of extended structures: syntheses and structures of Ag<sub>2</sub>[Pt(ox)<sub>2</sub>] $\cdot$ 2H<sub>2</sub>O and [Ag(H<sub>2</sub>O)]<sub>2</sub>[Ag<sub>2</sub>(CF<sub>3</sub>SO<sub>3</sub>)<sub>4</sub>][Pt(acac)<sub>2</sub>]<sub>2</sub>. *Journal of the Chemical Society, Dalton Transactions* **1999**, (3), 273-274.

23. Marandi, F.; Fun, H.-K., Supramolecular Structure Formed by Directed Intermolecular Interactions in a Lead(II) Complex. *Z. Anorg. Allg. Chem.* **2008**, *634* (6-7), 1123-1126.
24. Reis, S. G.; Del Aguila-Sanchez, M. A.; Guedes, G. P.; Ferreira, G. B.; Novak, M. A.; Speziali, N. L.; Lopez-Ortiz, F.; Vaz, M. G., Synthesis, crystal structures and magnetic behaviour of four coordination compounds constructed with a phosphinic amide-TEMPO radical and  $[M(\text{hfac})_2]$  ( $M = \text{Cu(II)}$ ,  $\text{Co(II)}$  and  $\text{Mn(II)}$ ). *Dalton Trans.* **2014**, *43* (39), 14889-14901.
25. Zhu, H.-L.; Ng, S. W.,  $\mu$ -2-Methylpyrazine- $\mu$ -trifluoroacetato-silver(I). *Acta Crystallogr. E* **2004**, *60* (7), m939-m940.
26. Blake, A. J.; Champness, N. R.; Howdle, S. M.; Webb, P. B., Silver(I) coordination polymers using thioether macrocycle building blocks. *Inorg. Chem.* **2000**, *39* (5), 1035-1038.
27. Lennartson, A.; McKenzie, C. J., Bridging nitrile groups in a metal-organic framework. *J. Coord. Chem.* **2012**, *65* (23), 4194-4202.
28. Thuéry, P.; Masci, B.; Harrowfield, J., Complexation of Uranyl and Rare-Earth Ions by a Fluorinated Tetracarboxylate. Formation of a Layered Assembly and Three-Dimensional Frameworks. *Cryst. Growth Des.* **2013**, *13* (7), 3216-3224.
29. Sinnwell, M. A.; Baltrusaitis, J.; MacGillivray, L. R., Combination of Argentophilic and Perfluorophenyl-Perfluorophenyl Interactions Supports a Head-to-Head [2 + 2] Photodimerization in the Solid State. *Cryst. Growth Des.* **2015**, *15* (2), 538-541.
30. Deacon, G. B.; Junk, P. C.; Luu, J., Nucleophilic Aromatic Substitution of Bis(pentafluorophenyl)mercury with Various Bulky Nucleophiles and the Structures of  $[\text{Hg}(\text{C}_6\text{F}_4\text{X}-4)_2]$  ( $\text{X} = \text{cyclo-C}_5\text{H}_{10}\text{N}$ ,  $\text{OCH}(\text{CH}_3)_2$ ,  $\text{OC}(\text{CH}_3)_3$ ). *Australian Journal of Chemistry* **2013**, *66* (10), 1253-1259.
31. Zaman, M. B.; Udachin, K. A.; Ripmeester, J. A., One-dimensional coordination polymers generated from 1,2-bis(x-pyridyl)butadiyne ( $x = 3$  and  $4$ ) and bis(hexafluoroacetylacetonato) $M(\text{ii})$  ( $M = \text{Cu}$ ,  $\text{Mn}$ ,  $\text{Zn}$ ). *CrystEngComm* **2002**, *4* (103), 613-617.
32. Seidel, R. W.; Oppel, I. M., Assembly of a rhomboidally distorted (4,4)-net based polymeric sheet structure bearing copper(ii) 5,10,15,20-tetra(4-pyridyl)porphyrin. *CrystEngComm* **2010**, *12* (4), 1051-1053.
33. Moreau, G.; Scopelliti, R.; Helm, L.; Purans, J.; Merbach, A. E., Solution X-ray Absorption Fine Structure Study of the  $\text{Eu}^{2+}$  and  $\text{Sr}^{2+}$  Ions: Unexpected Solvent and Metal Ion Dependencies of the Solvation Numbers. *The Journal of Physical Chemistry A* **2002**, *106* (41), 9612-9622.
34. Khavasi, H. R.; Rahimi, N., Coordination Polymers with Intramolecular Fluorine-Involved Contacts in Two-Dimensional Sheet Windows. *Cryst. Growth Des.* **2017**, *17* (2), 834-845.
35. Luo, G.-G.; Sun, D.; Zhang, N.; Huang, R.-B.; Zheng, L.-S., Low dimensional metal-organic frameworks (MOFs) constructed from simple aminopyrimidyl derivatives: From oligomer to single neutral zigzag chain and doubly ionic chains. *J. Mol. Struct.* **2009**, *938* (1-3), 65-69.
36. Wang, S. M.; Zhao, L.; Mak, T. C., Coordination networks constructed with the multinuclear silver-ethynide supramolecular synthon 4-nitrophenyl- $\text{C}\equiv\text{C}\Rightarrow\text{Ag}_{(n)}$  ( $n = 3, 4, 5$ ). *Dalton Trans.* **2010**, *39* (8), 2108-2121.
37. Halper, S. R.; Cohen, S. M., Self-assembly of heteroleptic  $[\text{Cu}(\text{dipyrrinato})(\text{hfacac})]$  complexes directed by fluorine-fluorine interactions. *Inorg. Chem.* **2005**, *44* (12), 4139-4141.
38. Toledo, D.; Vega, A.; Pizarro, N.; Baggio, R.; Peña, O.; Roisnel, T.; Pivan, J.-Y.; Moreno, Y., Comparative study on structural, magnetic and spectroscopic properties of four

new copper(II) coordination polymers with 4'-substituted terpyridine ligands. *Journal of Solid State Chemistry* **2017**, *253*, 78-88.

39. Wan, C.-Q.; Li, A.-M.; Sun, X.-Z.; Yan, H.-J.; Deng, Y.-H.; Cao, S.-L., The V-shaped semi-rigid di-4-pyridyl sulfone-N,N'-dioxide ligand and its silver(I), manganese(II) and zinc(II) complexes: Anion tuning and supramolecular assembly. *Polyhedron* **2014**, *68*, 303-311.

40. Seki, T.; Ida, K.; Ito, H., A meta-diisocyanide benzene-based aryl gold isocyanide complex exhibiting multiple solid-state molecular arrangements and luminescent mechanochromism. *Materials Chemistry Frontiers* **2018**, *2* (6), 1195-1200.

41. Aguirre-Díaz, L. M.; Iglesias, M.; Snejko, N.; Gutiérrez-Puebla, E.; Monge, M. Á., Toward understanding the structure–catalyst activity relationship of new indium MOFs as catalysts for solvent-free ketone cyanosilylation. *RSC Advances* **2015**, *5* (10), 7058-7065.

42. Marandi, F.; Hanasavi, Z.; Farzaneh, H., Synthesis and crystal structures of two lead(II) complexes of 4,4,4-trifluoro-1-naphthyl-1,3-butanedione ligand, subtle interplay of weak intermolecular interactions. *J. Coord. Chem.* **2009**, *62* (20), 3332-3342.

43. Ramesh, J.; Sujatha, S.; Arunkumar, C., Synthesis, structure, electrochemical, DNA interaction and antimicrobial studies of fluorinated trans-dicationic pyridinium porphyrins. *RSC Advances* **2016**, *6* (68), 63271-63285.

44. Banerjee, S.; Dastidar, P., Studying fluorous interactions in a series of coordination compounds derived from mono-pyridyl ligands equipped with hydrogen bonding functionality: exploiting anion $\cdots\pi$ F interaction in separating ClO<sub>4</sub><sup>-</sup> anion from a competing mixture of anions. *CrystEngComm* **2013**, *15* (45), 9415-9428.

45. Brüdgam, I.; Lentz, D.; Vorbrüggen, H., Synthesis, crystal and molecular structure of alkali metal nonaflates. *CrystEngComm* **2010**, *12* (3), 795-800.

46. Zerbe, E.-M.; Jones, P. G.; Blaschette, A., Structures of Ionic Di(arenesulfonyl)amides. 8. Sodium Bis[di(4-fluorobenzenesulfonyl)amido-N]argentate: A Heterobimetallic Complex Exhibiting a Lamellar Layer Structure and Short C-H $\cdots$ F-C Interlayer Contacts. *Z. Anorg. Allg. Chem.* **2007**, *633* (8), 1265-1270.

47. Zhang, Z. H.; Zhang, Q. Q.; Feng, S.; Hu, Z. J.; Chen, S. C.; Chen, Q.; He, M. Y., Fluorinated metal-organic frameworks of 1,4-bis(1,2,4-triazol-1-ylmethyl)-2,3,5,6-tetrafluorobenzene: synergistic interactions of ligand isomerism and counteranions. *Dalton Trans.* **2014**, *43* (2), 646-655.

48. Wang, Q.-M.; Mak, T. C. W., Novel Honeycomb-Like Layered Structure: The First Isomorphous Triple Salts of Silver Acetylides. *J. Am. Chem. Soc.* **2000**, *122* (31), 7608-7609.

49. de Souza, M. S.; Briganti, M.; Reis, S. G.; Stinghen, D.; Bortolot, C. S.; Cassaro, R. A. A.; Guedes, G. P.; da Silva, F. C.; Ferreira, V. F.; Novak, M. A.; Soriano, S.; Totti, F.; Vaz, M. G. F., Magnetic Cationic Copper(II) Chains and a Mononuclear Cobalt(II) Complex Containing [Ln(hfac)<sub>4</sub>]<sup>-</sup> Blocks as Counterions. *Inorg. Chem.* **2019**, *58* (3), 1976-1987.

50. Ma, C.; Sun, J.; Zhang, R.; Wang, D., Self-assembled diorganotin(IV) moieties with 2,3,4,5-tetrafluorobenzoic acid: Syntheses, characterizations and crystal structures. *Inorg. Chim. Acta* **2006**, *359* (13), 4179-4190.

51. Smith, J. A.; Singh-Wilmot, M. A.; Carter, K. P.; Cahill, C. L.; Ridenour, J. A., Lanthanide-2,3,5,6-Tetrabromoterephthalic Acid Metal–Organic Frameworks: Evolution of Halogen $\cdots$ Halogen Interactions across the Lanthanide Series and Their Potential as Selective Bifunctional Sensors for the Detection of Fe<sup>3+</sup>, Cu<sup>2+</sup>, and Nitroaromatics. *Cryst. Growth Des.* **2019**, *19* (1), 305-319.
